# Supplementary material for: Mapping and characterizing N6-methyladenine in eukaryotic genomes using single-molecule real-time sequencing
Source: PubMed Central journal article supplement — Genome Res. 2018 Jul;28(7):1067–78. doi: 10.1101/gr.231068.117 (PMC6028124; doi:10.1101/gr.231068.117), 2018-07
Supplement: supp_gr.231068.117_Supplemental_Fig_S2.pdf [file supp_gr.231068.117_Supplemental_Fig_S2.pdf]

Non-m<sup>6</sup>dA motif sites work well as faux-WGA for motif calling

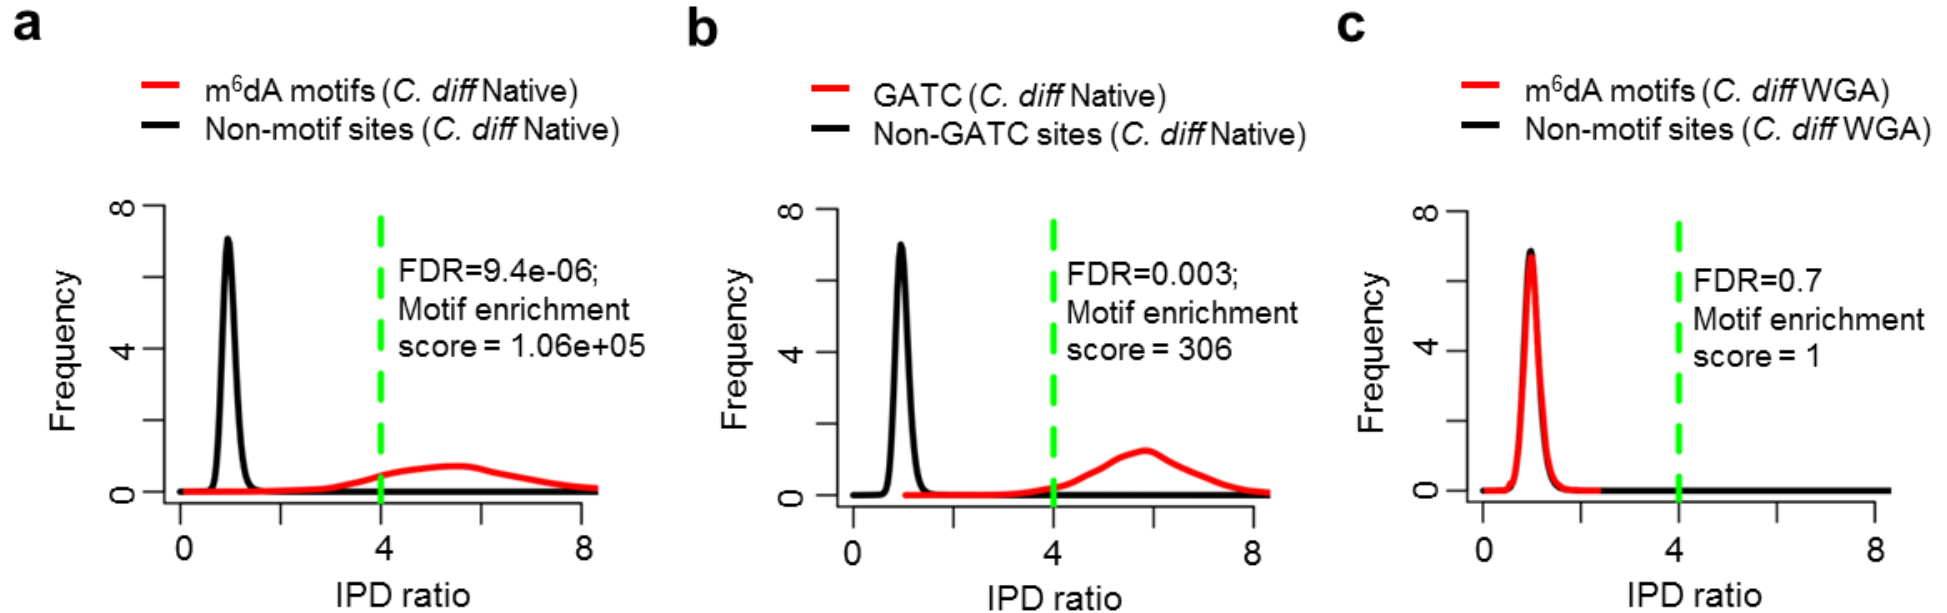

**Supplemental Fig S2.** SMRT-seq data from native DNA can be used for reliable motif calling, as illustrated using a *C. diff* methylome. (a) The IPD ratio distribution of all *C. diff* m<sup>6</sup>dA motifs (CAAAAA, GATC, GCMGAAG, GAANNNNNNCTG, and CAGNNNNNNNTTC) were compared with that of all non-motif sites in the same native sample, giving a significant methylation enrichment score of 1.06e+05 (IPD ratio>4), highly consistent with the methylation enrichment score calculated using both native and WGA data (Fig. 2d). (b) GATC motif sites were compared with all the remaining sites (including other m<sup>6</sup>dA sites) in the same native sample, also giving a significant enrichment score of 306. (c) As a negative control, the IPD ratio distribution of all *C. diff* m<sup>6</sup>dA motifs is compared with that of all non-motif sites in the same WGA sample, giving an insignificant enrichment score of 1.
