# Supplementary material for: Mapping and characterizing N6-methyladenine in eukaryotic genomes using single-molecule real-time sequencing
Source: PubMed Central journal article supplement — Genome Res. 2018 Jul;28(7):1067–78. doi: 10.1101/gr.231068.117 (PMC6028124; doi:10.1101/gr.231068.117), 2018-07
Supplement: supp_gr.231068.117_Supplemental_Fig_S3.pdf [file supp_gr.231068.117_Supplemental_Fig_S3.pdf]

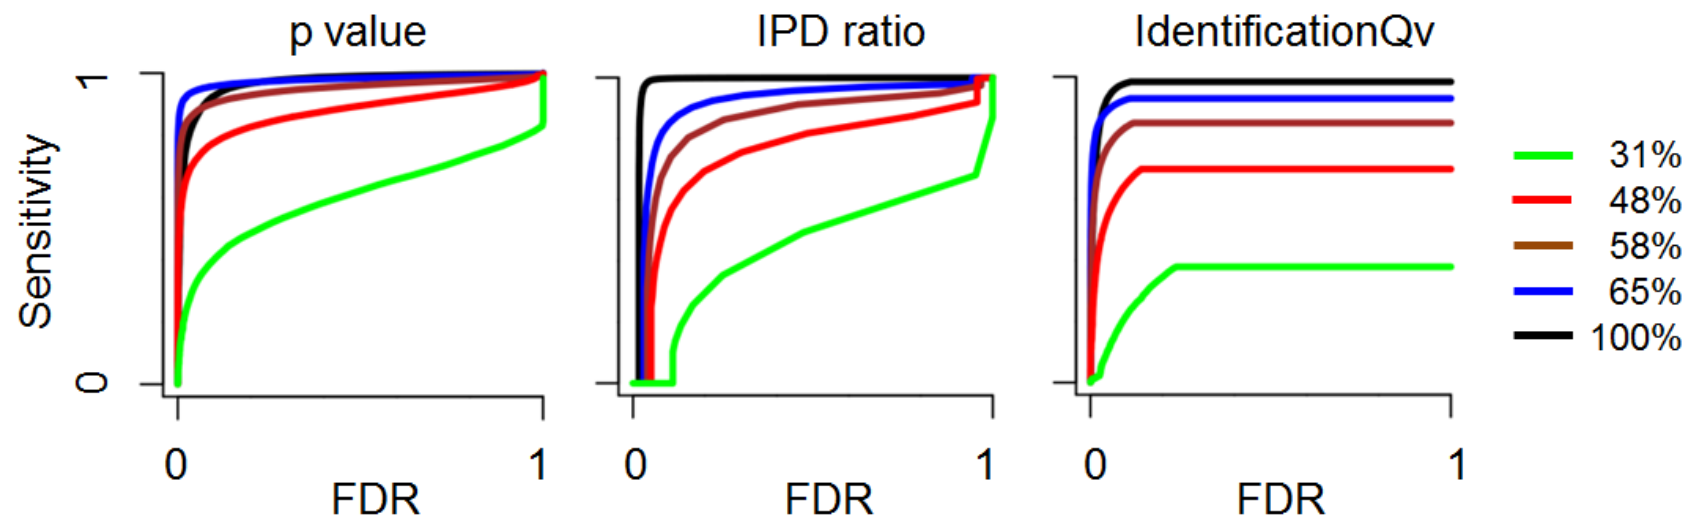

**Supplemental Fig S3.** Sensitivity vs. FDR curves for p value, IPD ratio, and identificationQv at different levels of partial m<sup>6</sup>dA methylation (subsamped from real SMRT-seq data of *E. coli* strain C227; see **Methods**).
