# Supplementary material for: Mapping and characterizing N6-methyladenine in eukaryotic genomes using single-molecule real-time sequencing
Source: PubMed Central journal article supplement — Genome Res. 2018 Jul;28(7):1067–78. doi: 10.1101/gr.231068.117 (PMC6028124; doi:10.1101/gr.231068.117), 2018-07
Supplement: supp_gr.231068.117_Supplemental_Fig_S4.pdf [file supp_gr.231068.117_Supplemental_Fig_S4.pdf]

**a**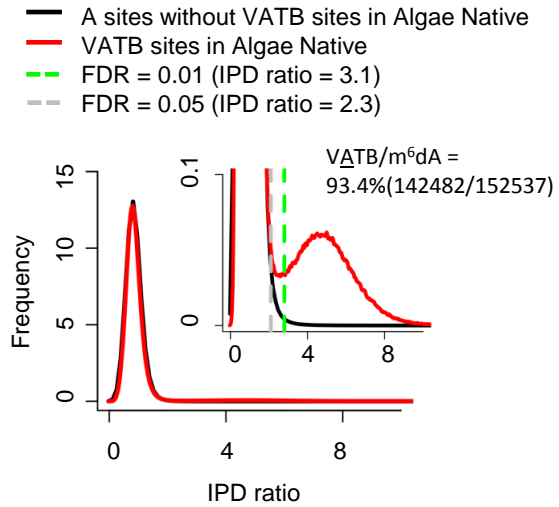**b**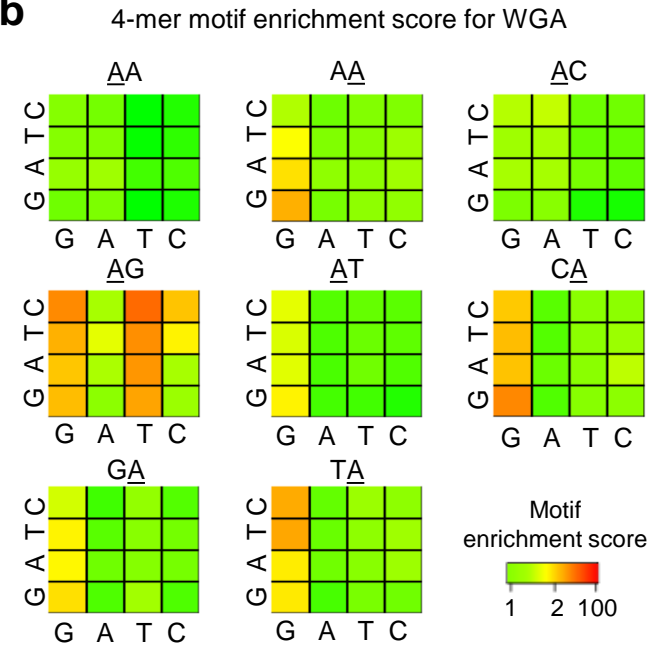**c**

Adjusted 4-mer motif enrichment score by comparing Native with WGA

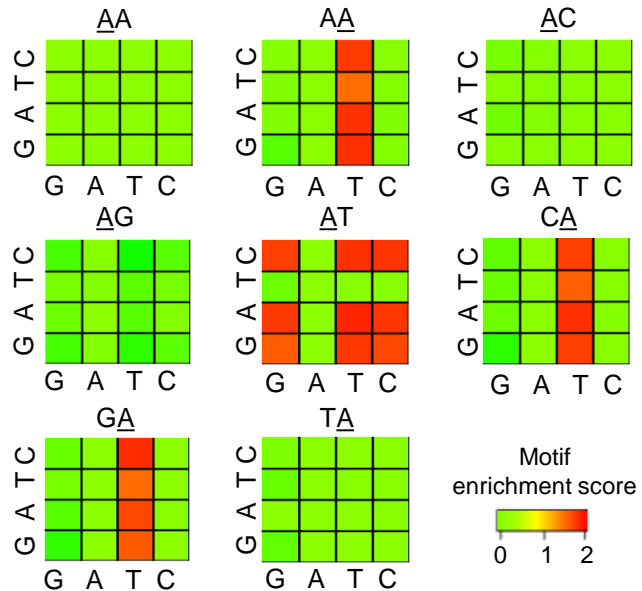**d**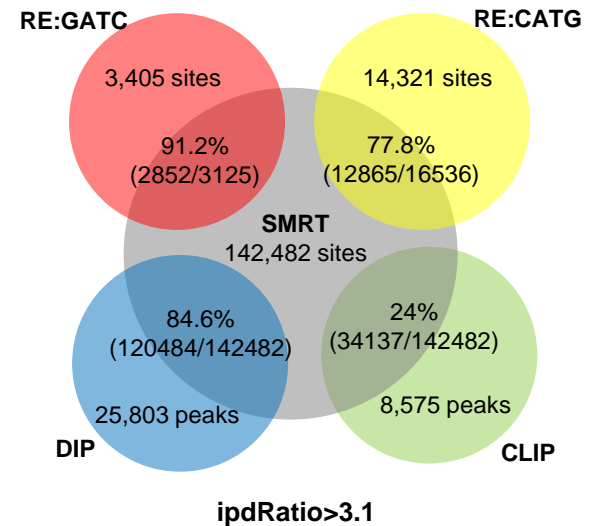

**e**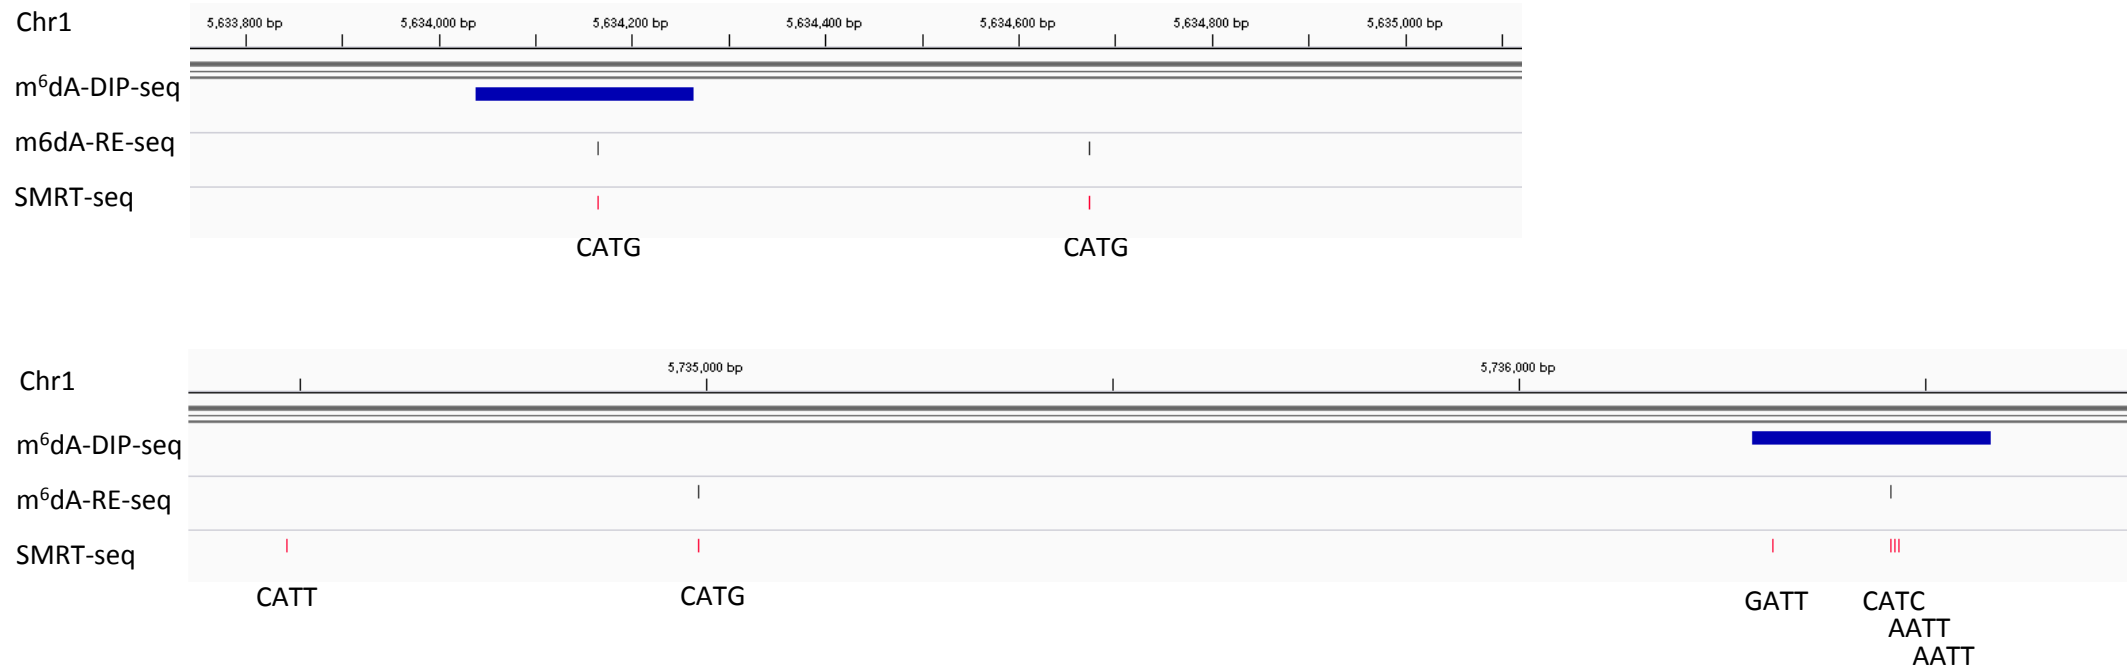**f**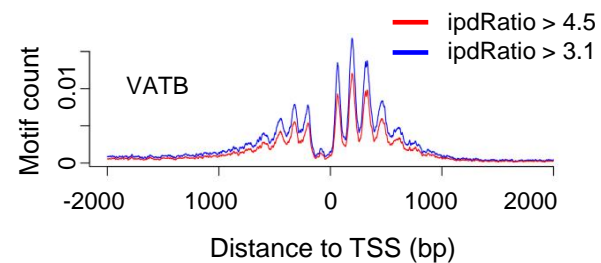**g**

Association between motif count and gene expression

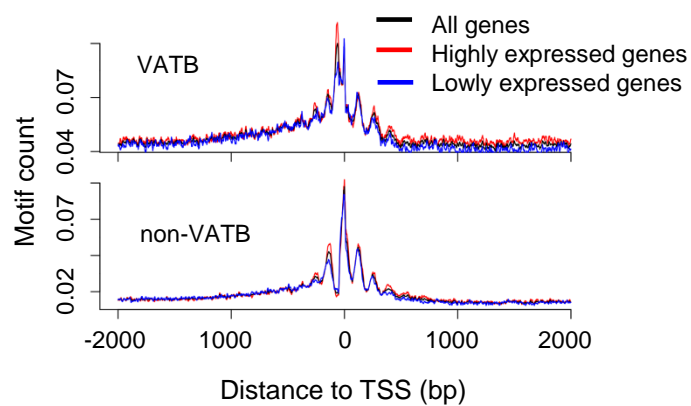**h**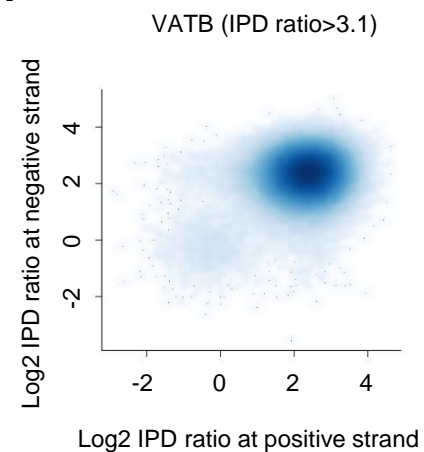

**Supplemental Fig S4.** Additional data in the characterization of a complete m<sup>6</sup>dA methylome of *C. reinhardtii*. **(a)** FDR estimation by comparing the IPD ratio distribution of *C. reinhardtii* of VATB site (red) with all other A sites (black) within the native sample. The inset provides an enlarged view. **(b)** A rigorous motif enrichment analysis for WGA as a negative control. Each 4x4 heatmap corresponds to all sixteen 4-mer motifs, for which 2nd and 3rd bases are fixed at the center/title. The rows and columns in the heatmaps represent the first and last bases of 4-mer motifs. Each cell in the following 4x4 heatmaps shows the motif enrichment scores for the WGA DNA sample. **(c)** The ratio of the motif scores between the native DNA and the WGA control. **(d)** Putative m<sup>6</sup>dA sites called by SMRT-seq (IPD ratio > 3.1) are highly consistent with those detected by independent techniques: m<sup>6</sup>dA-DIP-seq (DIP), m<sup>6</sup>dA-CLIP-exo-seq (CLIP) and m<sup>6</sup>dA-RE-seq (RE). **(e)** Illustrative examples showing m<sup>6</sup>dA events called by m<sup>6</sup>dA-DIP-seq, m<sup>6</sup>dA-RE-seq, and SMRT-seq. The motif content is annotated for each m<sup>6</sup>dA event. An m<sup>6</sup>dA event will be missed by m<sup>6</sup>dA-RE-seq if the event resides in a motif context not recognized by the RE. m<sup>6</sup>dA-DIP-seq can miss an m<sup>6</sup>dA event due to certain bias and lack of sensitivity commonly associated with antibody based approaches. **(f)** The distribution of putative methylated VATB motif count around TSS (red curve with IPD ratio > 4.5 and blue curve with IPD ratio > 3.1). The area covered by the peak is approximated as the multiplication of peak height and the number of nucleotide in the linker region (~70nt): area under curve is ~1 for IPD ratio > 4.5 and ~1.2 for IPD ratio > 3.1, respectively. **(g)** No clear association between gene expression and VATB motif count (top panel) as well as non-VATB (i.e. TATN/NATA). Motif counts are compared between three groups of genes: all genes (black), highly expressed (red, FPKM>1) and lowly expressed genes (blue, FPKM<1). **(h)** Single molecule, strand-specific analysis of SMRT-seq data to examine full-, non- or hemi-methylation status at putative m<sup>6</sup>dA sites (VATB with IPD ratio > 3.1). The X- and Y- axes denote the single molecule, strand-specific IPD ratio of each pair of reverse-complementary VATB sites at the two strands of each single molecule.
