# Supplementary material for: Mapping and characterizing N6-methyladenine in eukaryotic genomes using single-molecule real-time sequencing
Source: PubMed Central journal article supplement — Genome Res. 2018 Jul;28(7):1067–78. doi: 10.1101/gr.231068.117 (PMC6028124; doi:10.1101/gr.231068.117), 2018-07
Supplement: supp_gr.231068.117_Supplemental_Fig_S5.pdf [file supp_gr.231068.117_Supplemental_Fig_S5.pdf]

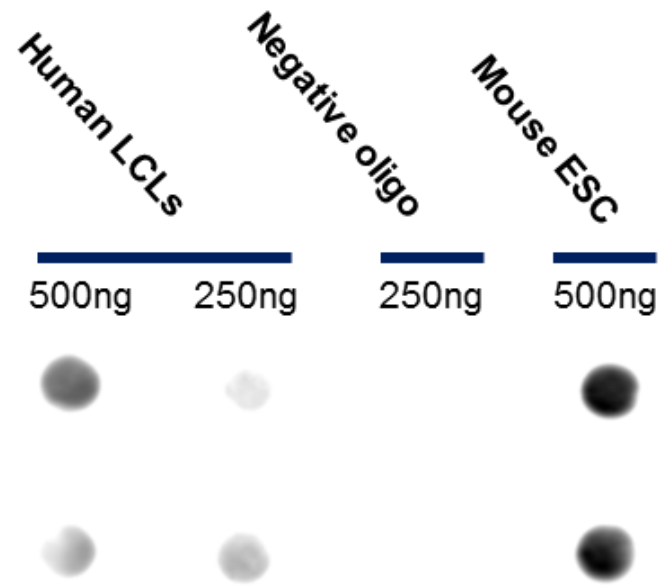

**Supplemental Fig S5.** DNA m<sup>6</sup>dA dot blots support the existence of m<sup>6</sup>dA in Human lymphoblastoid cell lines (LCLs) cells, where mESC and m<sup>6</sup>dA-free DNA oligos are used as positive and negative controls, respectively. The two rows are technical replicates.
