# Supplementary material for: Mapping and characterizing N6-methyladenine in eukaryotic genomes using single-molecule real-time sequencing
Source: PubMed Central journal article supplement — Genome Res. 2018 Jul;28(7):1067–78. doi: 10.1101/gr.231068.117 (PMC6028124; doi:10.1101/gr.231068.117), 2018-07
Supplement: supp_gr.231068.117_Supplemental_Fig_S6.pdf [file supp_gr.231068.117_Supplemental_Fig_S6.pdf]

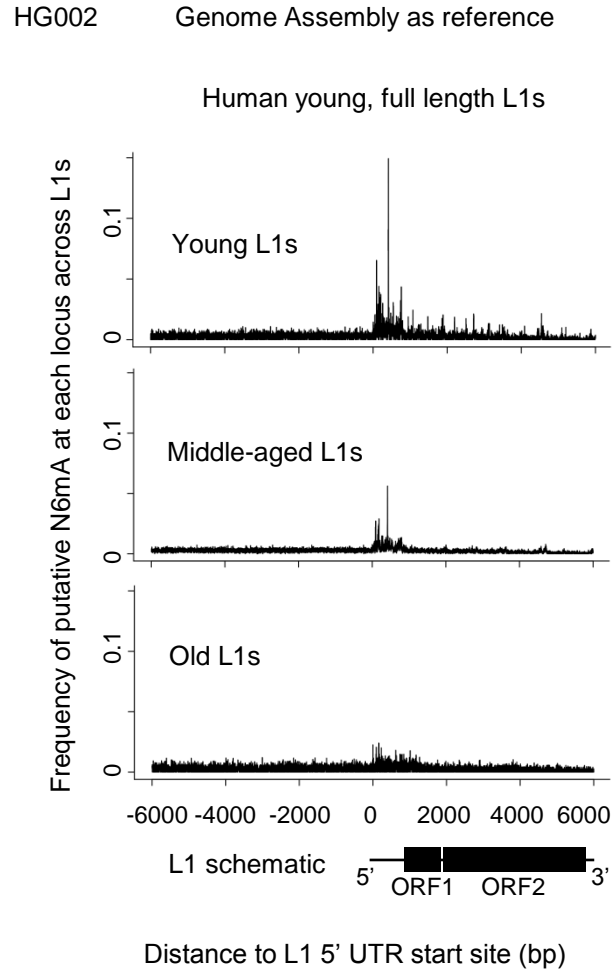

**Supplemental Fig S6.** Mean IPD ratio of A sites (adjusted by the frequency of A's) across 1,274 young (evolutionary age < 10 million years), full-length (> 6,000 bp) L1s. The consensus analyses (IPD ratio > 3) were conducted across the +/- 6,000 bp beyond the 5' UTRs of human young L1s (top panel), middle-aged L1s (middle panel) and old L1s (bottom panel) using *de novo* genome assembly (Zook *et al.*).
