# Supplementary material for: Mapping and characterizing N6-methyladenine in eukaryotic genomes using single-molecule real-time sequencing
Source: PubMed Central journal article supplement — Genome Res. 2018 Jul;28(7):1067–78. doi: 10.1101/gr.231068.117 (PMC6028124; doi:10.1101/gr.231068.117), 2018-07
Supplement: supp_gr.231068.117_Supplemental_Fig_S7.pdf [file supp_gr.231068.117_Supplemental_Fig_S7.pdf]

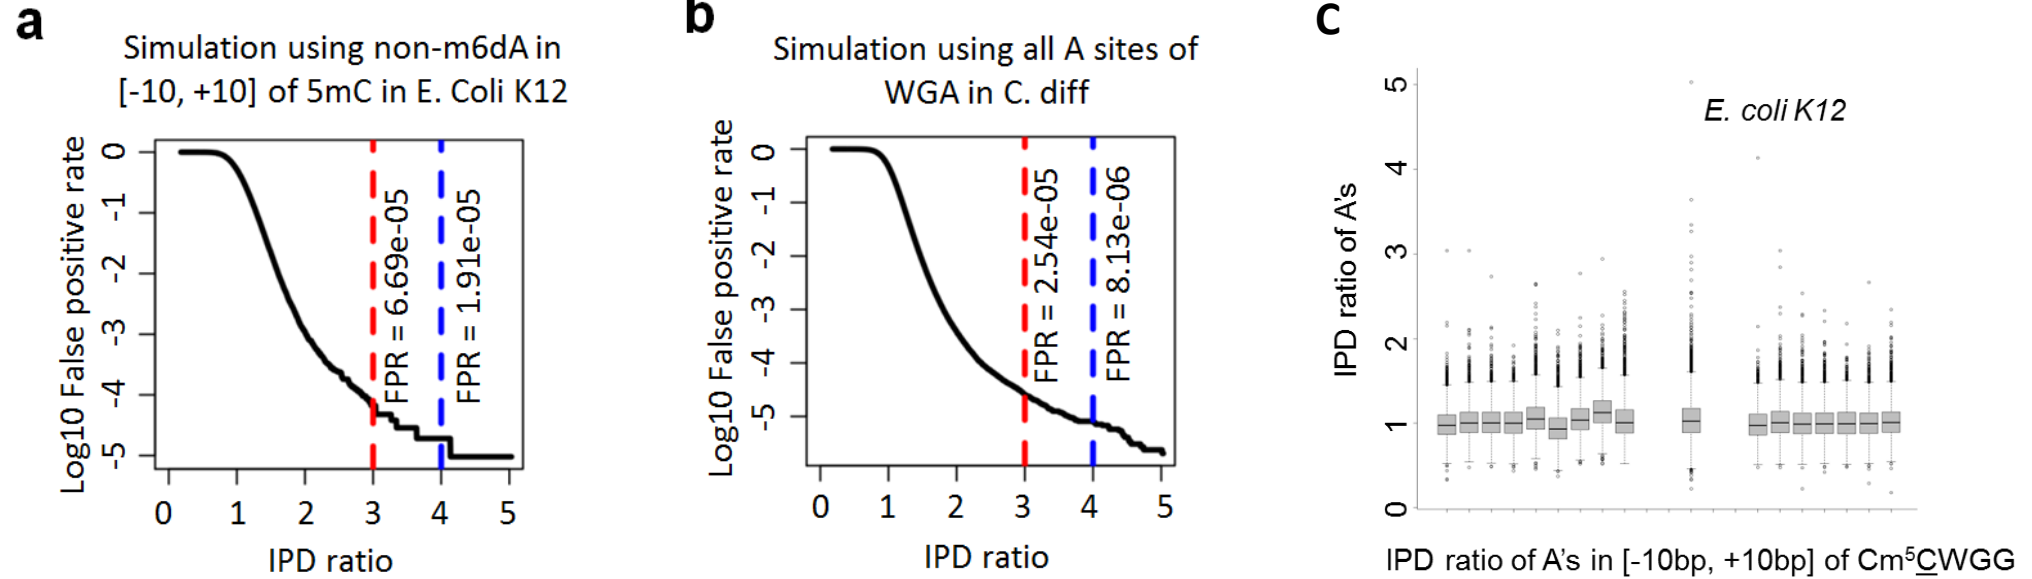

**Supplemental Fig S7.** Examination of false positive m<sup>6</sup>dA calling surrounding m<sup>5</sup>C. **(a)** The *E. coli* methylome with m<sup>5</sup>C events was used to estimate the false positive rate (FPR) of m<sup>6</sup>dA calling positioned in the vicinity (+/-10bp) of m<sup>5</sup>C sites. Different cutoffs (X axis) were interrogated, and the corresponding  $-\log_{10}$  false positive rates (Y axis) are shown as the black curve. The red and blue dashed lines indicate that the FPRs at IPD ratios of 3 and 4 are  $6.69 \times 10^{-5}$  and  $1.91 \times 10^{-5}$ , respectively. **(b)** The *Clostridium* methylome was used to estimate FPR of m<sup>6</sup>dA calling sites without m<sup>5</sup>C bias. The red and blue dashed lines indicate that the FPRs at IPD ratio of 3 and 4 are  $2.54 \times 10^{-5}$  and  $8.13 \times 10^{-6}$ , respectively. **(c)** Influence of m<sup>5</sup>C on the IPD ratio of its adjacent A's in *E. coli* K12. The boxplot shows the IPD ratio distribution of A's. The X axis represents the A's in the [-10bp, +10bp] of Cm<sup>5</sup>CWGG. The Y axis represents the IPD ratio of A's.
