# Supplementary material for: Mapping and characterizing N6-methyladenine in eukaryotic genomes using single-molecule real-time sequencing
Source: PubMed Central journal article supplement — Genome Res. 2018 Jul;28(7):1067–78. doi: 10.1101/gr.231068.117 (PMC6028124; doi:10.1101/gr.231068.117), 2018-07
Supplement: supp_gr.231068.117_Supplemental_Fig_S8.pdf [file supp_gr.231068.117_Supplemental_Fig_S8.pdf]

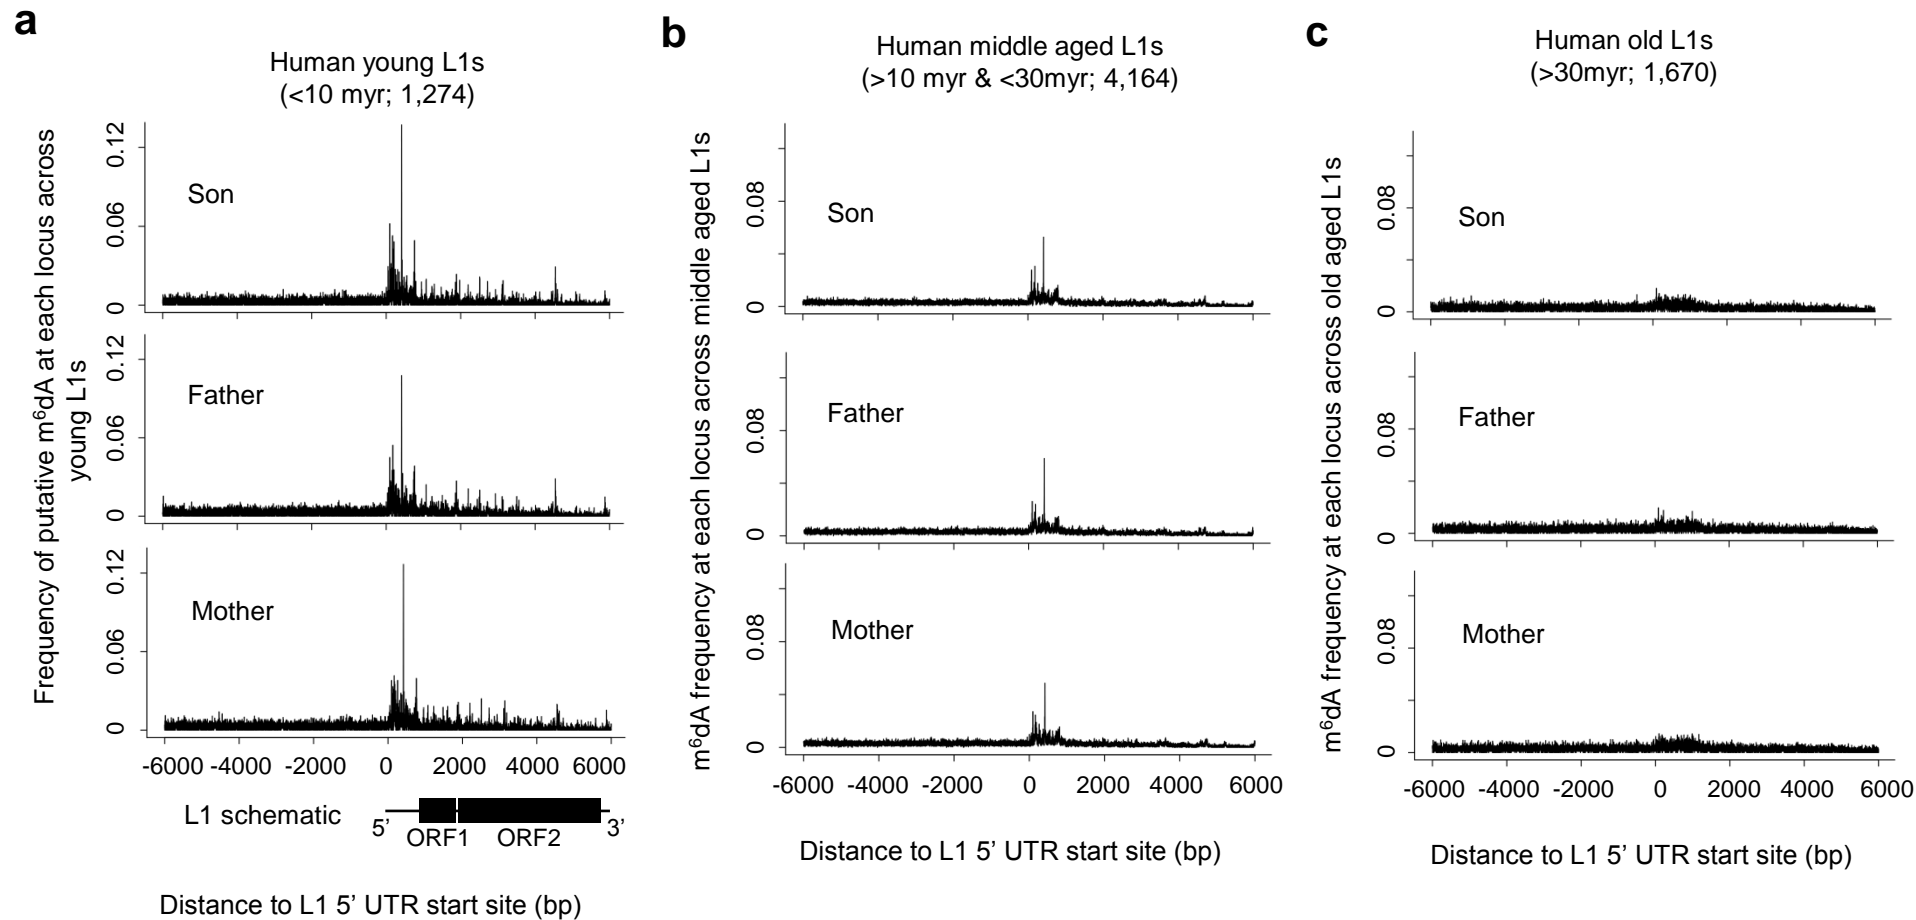

**Supplemental Fig S8.** Adjustment of false positive  $m^6dA$  due to neighboring  $m^5C$  events on Human young full-length L1s. We analyzed an *E. coli* methylome and estimated that putative  $m^6dA$  sites (IPD ratio > 3) called in the hLCLs data correspond to an FDR of < 0.016 with respect to A's that are positioned in the vicinity (+/-10bp) of  $m^5C$  sites. Based on this estimation, we used IPD ratio of 3 as the cutoff to plot the consensus of putative  $m^6dA$  events at each locus (adjusted by the frequency of A's) across 1,274 young (evolutionary age <10 million years) L1s **(a)**, 4,164 middle-aged (evolutionary age >10 & <30 million years) L1s **(b)**, and 1,670 old (evolutionary age >30 million years) L1s **(c)** for the three hLCL lines. Consistent across the three hLCL lines,  $m^6dA$  is enriched at young full-length L1s, compared to middle-aged and old L1s, specifically in the promoter and proximal region.
