# Supplementary material for: Mapping and characterizing N6-methyladenine in eukaryotic genomes using single-molecule real-time sequencing
Source: PubMed Central journal article supplement — Genome Res. 2018 Jul;28(7):1067–78. doi: 10.1101/gr.231068.117 (PMC6028124; doi:10.1101/gr.231068.117), 2018-07
Supplement: supp_gr.231068.117_Supplemental_Fig_S11.pdf [file supp_gr.231068.117_Supplemental_Fig_S11.pdf]

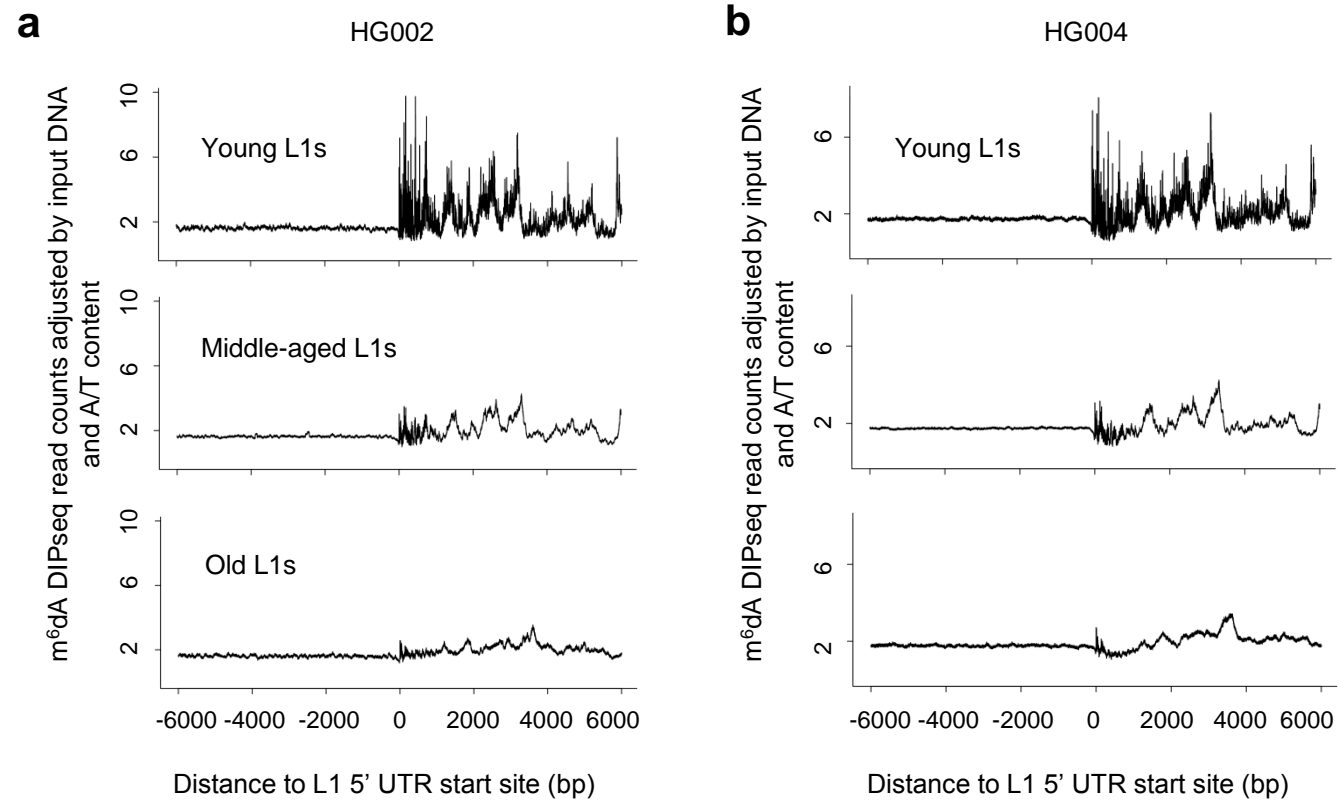

**Supplemental Fig S11.** Average m<sup>6</sup>dA-DIP-Seq read count (adjusted for the read count from input DNA sample and A/T content) on Human LCLs young (1,274), middle-aged (4,164), and old L1 elements (1,670), for hLCL HG002 **(a)** and hLCL HG004 **(b)**, respectively. Consistent across the three hLCL lines, m<sup>6</sup>dA is enriched at the promoter and proximal region of young full-length L1s.
