# Supplementary material for: Mapping and characterizing N6-methyladenine in eukaryotic genomes using single-molecule real-time sequencing
Source: PubMed Central journal article supplement — Genome Res. 2018 Jul;28(7):1067–78. doi: 10.1101/gr.231068.117 (PMC6028124; doi:10.1101/gr.231068.117), 2018-07
Supplement: supp_gr.231068.117_Supplemental_Fig_S12.pdf [file supp_gr.231068.117_Supplemental_Fig_S12.pdf]

**a** 2-mer motif enrichment score for WGA (Alzheimer disease Iso-seq)

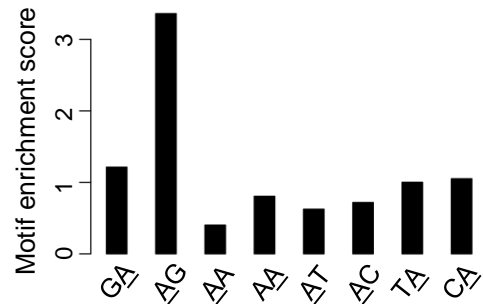

**b** 4-mer motif enrichment score for WGA (Alzheimer disease Iso-seq)

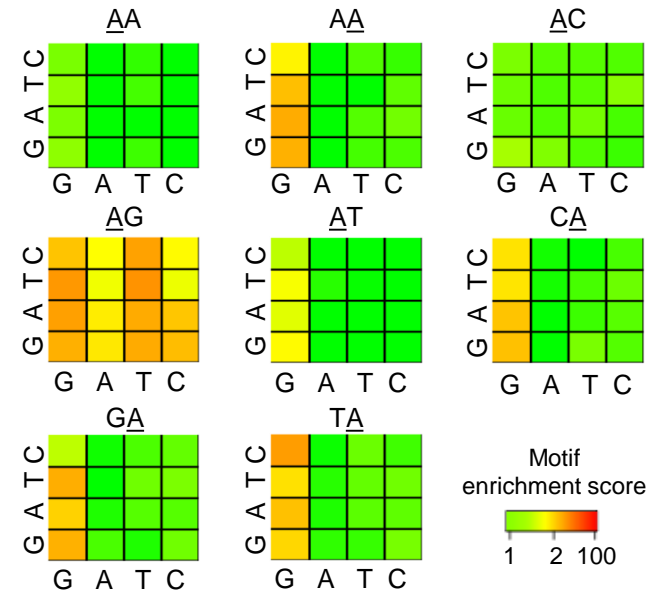

**Supplemental Fig S12.** Motif enrichment score in a WGA sample (Alzheimer’s disease Iso-seq dataset) as a negative control. **(a)** 2-mer motif enrichment score in the WGA sample. The barplot represents the motif enrichment score of all dinucleotide motifs. The putative methylated position is underscored. **(b)** 4-mer motif enrichment score in the WGA sample. Each 4x4 heatmap corresponds to all sixteen 4-mer motifs, for which 2nd and 3rd bases are fixed at the center/title. The rows and columns in the heatmaps represent the first and last bases of 4-mer motifs. Each cell in the following 4x4 heatmap shows the motif enrichment score based on the WGA sample. The motif enrichment scores for 2-mer motif AG and multiple 4-mer motifs with AG (e.g. AAGG, CAAG and TGAG) in the WGA are all much smaller than those in the native sample (Fig. 4f).
