# Supplementary material for: Mapping and characterizing N6-methyladenine in eukaryotic genomes using single-molecule real-time sequencing
Source: HighWire-hosted journal article supplement (doi:10.1101/gr.231068.117), 2018-05-15
Supplement: Supplemental_Fig_S1.pdf [file Supplemental_Fig_S1.pdf]

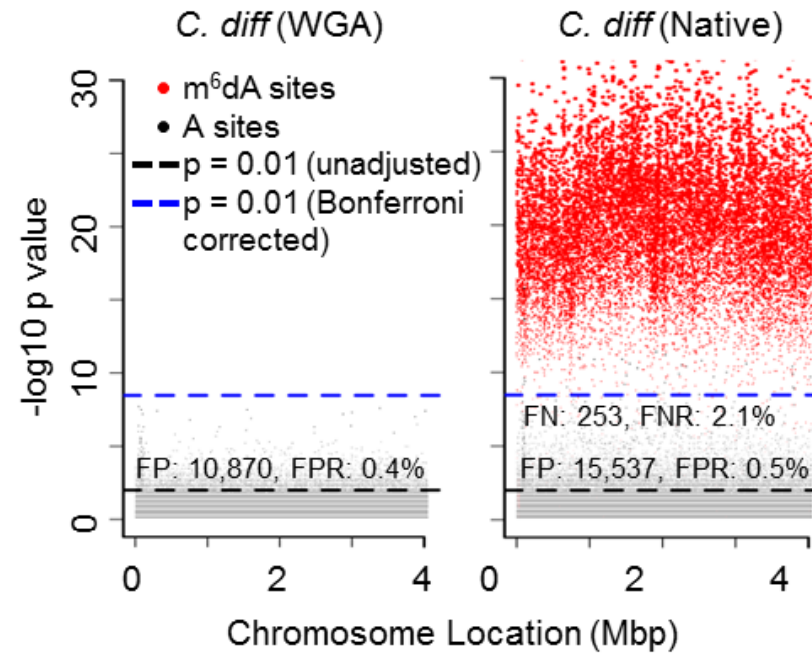

**Supplemental Fig S1.** False positive m<sup>6</sup>dA calls before and after correction for multiple hypothesis testing. The analysis was conducted on a well characterized native *Clostridium difficile* (*C. diff*) methylome (right) and its WGA sample (left; negative control without methylation). Red dots: known m<sup>6</sup>dA sites (CAAAAA); black dots: non-methylated adenine sites. At  $p < 0.01$  (student's  $t$ -test, unadjusted), 10,870 sites are called as false positive m<sup>6</sup>dA even from the WGA sample. In the native sample, 11,942 of 12,195 (97.9%) true m<sup>6</sup>dA sites remain significant after Bonferroni correction (corrected  $p < 0.01$ ). In contrast, none of the 10,870 false positive calls in WGA survives the Bonferroni correction.
