# Supplementary material for: Mapping and characterizing N6-methyladenine in eukaryotic genomes using single-molecule real-time sequencing
Source: HighWire-hosted journal article supplement (doi:10.1101/gr.231068.117), 2018-05-15
Supplement: Supplemental_Table_S1.xlsx [file Supplemental_Table_S1.xlsx]

## Sheet: Table 1
Supplemental Table 1. The table lists the SMRT-seq datasets used in this paper. The columns show the sample names, genome reference for read alignments, average coverage per single strand, chemistry for SMRT-seq, and SRA accession numbers, respectively.
Sample	Reference	Coverage (single strand)	Chemistry	Source	SRA BioProject
E. coli Native	E. coli K12 MG1655	60.5	P6-C4	Ref 3.
E. coli Native	E. coli C227	71.2	P4-C2	Ref 3.
E. coli WGA	E. coli C227	36.5	P4-C2	Ref 3.
C. innocuum Native	C. inno_assembly (NXNK00000000)	56.7	P5-C3	This study.	SRP102471
C. diff Native	CD00065_21024	153.7	P6-C4	This study*	SRP102628
C. diff WGA	CD00065_21024	130	P6-C4	This study.	SRP102628
H. pylori Native	HPJ99	128.2	P5-C3	Ref 16.
H. pylori Native	HP26695	64.2	P5-C3	Ref 16.
H. pylori Native	HPJP26 (CP023448)	83.3	P5-C3	This study.	SRP105216
S. aureus Native	MSSA54	101.9	P5-C3	This study.*	SRP102373
Steno Native	SM410	127.5	P4-C2	Ref 48.
Steno Native	SM263	150.6	P4-C2	Ref 48.
Steno Native	SM784	124.1	P4-C2	Ref 48.
Steno Native	Steno7753	50	P5-C3	Ref 48.
C. reinhardtii Native	JGI 9.0	54.3	P6-C4	This study.	SRP105217
C. reinhardtii WGA	JGI 9.0	27.1	P6-C4	This study.	SRP105217
Human Native (HG002)	Hg19	18.2	P6-C4	Ref 40.
Human Native (HG003)	Hg19	17.2	P6-C4	Ref 40.
Human Native (HG004)	Hg19	16.3	P6-C4	Ref 40.
Human WGA (Alzheimer’s disease Iso-seq)	Hg19	39.4	P6-C4	URL
* Two bacterial isolates will be described in a future manuscript summarizing a clinical transmission study.
