# Supplementary material for: Mapping and characterizing N6-methyladenine in eukaryotic genomes using single-molecule real-time sequencing
Source: HighWire-hosted journal article supplement (doi:10.1101/gr.231068.117), 2018-05-15
Supplement: Supplemental_Table_S2.xlsx [file Supplemental_Table_S2.xlsx]

## Sheet: Table 2
Supplemental Table 2. The table shows the summary of putative m6dA sites in each of the VATB motifs in C. reinhardtii. The columns give the motif, total motif count in the genome, number of putative m6dA sites from each motif and the fraction that each methylation motif explains out of all putative m6dA events detected in the genome at two different cutoffs (IPD ratio > 4.5 and > 3.1), respective…
Motif	Count	Count (IPD ratio>4.5)	Count (IPD ratio>4.5) /m6dA count	Count (IPD ratio >3.1)	Count (IPD ratio>3.1) /m6dA count
GATG	803538	18916	0.16	23730	0.17
GATT	270011	6451	0.055	8048	0.056
GATC	281099	5296	0.045	6258	0.044
AATG	466198	12504	0.11	15151	0.11
AATT	205013	7305	0.062	9072	0.064
AATC	269996	6823	0.058	8189	0.057
CATG	1147081	27569	0.23	33092	0.23
CATT	466454	12511	0.11	14945	0.1
CATC	804009	20366	0.17	24005	0.17
