# Supplementary material for: Mapping and characterizing N6-methyladenine in eukaryotic genomes using single-molecule real-time sequencing
Source: HighWire-hosted journal article supplement (doi:10.1101/gr.231068.117), 2018-05-15
Supplement: Supplemental_Table_S3.xlsx [file Supplemental_Table_S3.xlsx]

## Sheet: Table 3
Supplemental Table 3. The table lists the m6dA-DIP-seq datasets used in this paper. The columns give the sample names, genome reference for read alignments, total sequencing read count, and SRA accession numbers, respectively.
Sample	Reference	Read counts	SRA BioProject
Human Native m6dA-DIP-seq (HG002)	Hg19	54M	SRP128153
Human input DNA (HG002)	Hg19	36M	SRP128153
Human Native m6dA-DIP-seq (HG003)	Hg19	138M	SRP128153
Human input DNA (HG003)	Hg19	170M	SRP128153
Human Native m6dA-DIP-seq (HG004)	Hg19	228M	SRP128153
Human input DNA (HG004)	Hg19	201M	SRP128153
Human Native m6dA-DIP-seq (NA12878)	Hg19	35M	SRP128153
Human WGA m6dA-DIP-seq (NA12878)	Hg19	49M	SRP128153
Human input DNA (NA12878)	Hg19	125M	SRP128153
