# Supplementary material for: Mapping and characterizing N6-methyladenine in eukaryotic genomes using single-molecule real-time sequencing
Source: HighWire-hosted journal article supplement (doi:10.1101/gr.231068.117), 2018-05-15
Supplement: Supplemental_Text.docx [file Supplemental_Text.docx]

**Supplemental Text**

**False positive m6dA calls due to multiple hypothesis testing.** To illustrate, at *p* < 0.01 (student’s *t*-test, unadjusted), 10,870 sites are called as m6dA even from a WGA sample, i.e. negative control where no DNA modification is expected (Supplemental Fig S1). In a well characterized *C. diff* m6dA methylome (Supplemental Fig S1), 11,942 of 12,195 (97.9%) true m6dA sites remain significant after Bonferroni correction (corrected p < 0.01). In contrast, none of the 10,870 false positive calls in WGA survives the Bonferroni correction (Supplemental Fig S1). This illustrates the importance of multiple hypothesis correction, especially in eukaryotic species with much larger genomes and lower m6dA abundance (m6dA/A).

**Genome-wide m6dA/A level estimated by HPLC/MS**. The m6dA/A level estimated by HPLC/MS represents the fraction of total m6dA events divided by the total number of adenines in a gDNA sample. For m6dA methylomes with near 100% methylation at each m6dA site, the m6dA/A level estimated by HPLC/MS is expected to be essentially the same with the number of m6dA events called across a genome divided by the total number of adenines in the genome reference. However, in m6dA methylomes where each m6dA site is only partially methylated, the number of m6dA calls across the genome divided by total number of A’s is expected to be larger than the m6dA/A level estimated by HPLC/MS. In the latter case, several considerations are important regarding the estimation of expected FDRs (Fig. 2c) and the choice between different statistical measures (see below).

**Choice between different statistical measures**.Two widely used measures in SMRT sequencing-based detection of DNA modifications are: IPD ratio and student’s *t*-test p value (often transformed by 10*-log10(p) into a derived measure named *score*). For single nucleotide resolution detection of m6dA events, *p* value-based estimation can achieve lower levels of FDR, while IPD ratio-based estimation can achieve higher level of sensitivity (Fig. 2a-b). For the calculation of motif enrichment score, *p* value and IPD ratio show similar performance in the motif enrichment analysis (Fig. 2f); however, IPD ratio has a smaller variance (Fig. 2e) and a mean value that does not depend on sequencing coverage as much as *p* value. In addition, IPD ratio can reflect the extent of partial methylation at each site (a distribution with mean ~1 corresponds to 0% methylation, and a distribution with mean 4~5 corresponds to ~100% methylation), an advantage over *p* value. The choice of statistical measure depends on different factors and can be largely grouped into two categories. The first category applies to organisms that have relatively higher m6dA/A abundance (via HPLC/MS) such that a low FDR can be achieved with a practical SMRT sequencing coverage (Fig. 2c). For this category, the IPD ratio is suggested and is expected to provide the advantages described above. The green algae m6dA methylome analysis presented in this study is a good example of this category. The second category applies to organisms with low m6dA/A abundance (via HPLC/MS) *i.e.* IPD ratio would not be able to provide a reasonably good FDR unless a sufficient deep sequencing coverage is achieved. In the second category, *p* value is expected to provide lower FDR for detection, and a further IPD ratio analysis can be performed specifically for putative m6dA sites with significant *p* values.

**Motif specific detection of m6dA events.** For certain species with a low fraction of m6dA events across the genome, it is hard to achieve a sufficiently low FDR in SMRT-seq based m6dA calling according to our estimation (Fig. 2c). However, if some sequence motifs are enriched for m6dA events7, m6dA abundance () among those motif sites can be substantially higher than the global level of methylated adenines . More reliable m6dA calls with lower FDRs can be made in a motif specific m6dA calling.

**Intrinsic bias that could lead to false positive motif calls independent from DNA modifications**. An *in silico* IPD control model is widely used in SMRT sequencing based detection of DNA modifications ([URL](https://github.com/PacificBiosciences/Bioinformatics-Training/wiki/Base-Modification-Tools)). The *in silico* control model is trained from a large collection of WGA data; for each unique k-mer and a nucleotide position inside the k-mer, an expected IPD value is assigned, *i.e.* sequence context effect of IPD ([URL](https://github.com/PacificBiosciences/Bioinformatics-Training/wiki/Base-Modification-Tools)). Given a SMRT sequencing dataset of a native DNA sample, the IPD value at each genomic position, with a unique k-mer sequence context, is compared with the *in silico* control model to calculate an IPD ratio, a student’s *t*-test *p* value and an identificationQV. Because this *in silico* control model is trained from a finite number of WGA data (from bacterial genomes), it is expected that there are certain levels of inaccuracy as well as some implicit biases. For the study of bacterial m6dA methylomes, where m6dA events are highly motif driven, the inaccuracy and biases have minimal impact on methylation motif discovery. However, for the study of eukaryotic m6dA methylomes, where m6dA events are weakly motif driven, certain motifs may be enriched due to possible subtle methylation-independent biases in the *in silico* control model.

**Influence of m5C on the IPD ratios of normal A’s.** We investigated the influence of m5C, the most prevalent form of DNA methylation in eukaryotes, on the IPD ratios of normal A’s in SMRT-seq. *E. coli* K12 with well characterized m5C and m6dA events was used in this analysis. We checked the IPD ratio distributions of normal A’s within [-10bp, +10bp] of m5C events (essentially, all CCWGG sites have m5C events in *E. coli* K12), with all known m6dA methylation motifs excluded (GATC, GCACNNNNNNGTT and AACNNNNNNGTGC). As shown in Supplemental Fig S7c, the IPD ratio distribution of normal A’s close to m5C events is centered at 1, and the IPD ratio of almost all sites (>99.998%; FPR=0.002%) are smaller than 4. This analysis supports that m5C events are not expected to significantly confound m6dA analysis when a stringent cutoff is used on IPD ratio. Notably, the guidance on the choice of IPD ratio cutoffs as summarized in Fig. 2c is specifically for cases where m6dA events are fully methylated. For partially methylated m6dA events (e.g. human L1), the IPD ratios could be lower depending on the actual fraction of methylation at an adenine site, which raises a challenge in cutoff selection. For partially methylated m6dA events, the influence of m5C may indeed confound the detection of m6dA. This is also one of the reasons why we chose to investigate the consensus of m6dA on human L1s in this manuscript, rather than detecting high-confidence individual m6dA sites in hLCLs.

**Subread length and single molecule coverage.** Generally, there is a tradeoff between the subread length and single molecule coverage (CCS). With a certain SMRT-seq read length, higher single molecule coverage is associated with shorter subread, and lower single molecule coverage is associated with longer subread. In single molecule level analysis, IPDs are grouped by positions as well as by molecules for the calculation of single molecule, single nucleotide IPD ratios. For single nucleotide analysis (not single molecule), given a certain whole-genome coverage, the coverage at each single nucleotide/base is expected to be the same between a short SMRT insert design (shorter subreads, higher CCS coverage) and a long SMRT insert design (longer subreads, lower CCS coverage). Therefore, base calling is expected to have similar accuracies between the two designs.

**Detecting multiple types of DNA modifications simultaneously**. Theoretically, it is possible to detect different types of DNA modifications simultaneously in SMRT-seq, because, the IPD ratio signatures differ between m5C and m6dA as well as other forms of DNA modifications and damages, and these signatures can be potentially used to distinguish different forms of modifications from each other. However, to achieve this in practice, more comprehensive training data are needed (yet not currently available) in order to allow better model learning and differentiation between co-existing modifications based on their signatures. This is an important direction for future work.

**Supplemental Methods:**

**SMRT sequencing.** Long insert DNA library preparation and sequencing were performed according to the manufacturer’s instructions. Upon completion of library construction, samples were assessed for quantity and insert size using an Agilent DNA 12,000 gel chip. Additional size selection was conducted using Sage Science Blue Pippin 0.75% agarose cassettes to enrich for library in the range of 7,000–50,000 bp. This selection is necessary to narrow the library distribution and maximize the SMRTbell subread length. 11–23% of the input libraries were eluted from the agarose cassette and were available for sequencing. For all cases, this yield was sufficient to proceed to primer annealing and DNA sequencing on the Pacific Biosciences RSII machine. Primer was then annealed to the size-selected SMRTbells with the full-length libraries (80 °C for 2min 30 followed by decreasing the temperature by 0.1 °C per second to 25 °C). The polymerase–template complex was then bound to the P6, P5 or P4 enzyme using a ratio of 10:1 polymerase to SMRTbell at 0.5nM for 4 h at 30 °C and then held at 4 ̊C until ready for magbead loading, before sequencing. The magnetic bead-loading step was conducted at 4 °C for 60 min per manufacturer’s guidelines. The magbead-loaded, polymerase-bound, SMRTbell libraries were placed onto the RSII machine at a sequencing concentration of 75pM and configured for a 180 min continuous sequencing run. For all short (250bp-2kb) insert library preparations, similar methodology was used, except shearing was done using a Covaris microtube ultrasonication and all AMPure XP purification steps were done using a 1.8X volume ratio. Libraries were completed without the size selection step used for the long-insert libraries. Similar procedures were followed for sequencing, except that diffusion-based loading was used instead of magbead loading.

**Examining the effects of multiple possible confounding factors in the consensus analysis of m6dA events across L1s in hLCLs**. Because L1 elements are known to be repressed by m5C events43, which are also associated with altered IPDs, we analyzed an *E. coli* methylome3 with well-characterized m5C and m6dA events. Using the *E.* coli methylome as a known control (Supplemental Fig S7), we estimated that the putative m6dA sites (IPD ratio > 3) called in the hLCLs data correspond to an FDR of < 0.012 with respect to all adenine nucleotides and an FDR of < 0.016 with respect to adenine sites that are positioned in the vicinity (+/-10bp) of m5C sites. Based on this FDR analysis, a consensus analysis (IPD ratio > 3) across the +/-6,000bp beyond the 5’ UTRs of full-length L1s suggests that the enrichment of putative m6dA events in young full length L1s (Supplemental Fig S8) is not simply due to complications from multiple hypothesis testing or nearby m5C events on human L1s.

Adjustment for outlier effect resulting from sequencing errors in SMRT-seq: IPD outliers (high values) sometime survive standard outlier removal procedures.They are often associated with sequencing errors in SMRT-seq, and can lead to spuriously high IPD ratios. To adjust for the bias due to such outliers, we filter out IPDs from all sites in the vicinity (+/-10bp) of each mismatch site on each subread. The consensus analyses were conducted for all four nucleotides across the +/-6,000bp beyond the 5’ UTRs of Human young L1s (Supplemental Fig S9a & S10b).

Adjustment for SNP effect (heterozygous genotype at certain loci): the expected IPD value for each reference position based on the *in silico* control model depends on the flanking sequence context of the nucleotide. For reference positions where sequence context does not match between the reference genome and actual genome (referred to as *reference mismatch*) or when the locus has a heterozygous genotype, the expected IPD value obtained from the *in silico* control model would be incorrect for all (reference mismatch) or half of the DNA molecules (heterozygous genotype). The false positive modification calls due to these incorrect expected IPDs are referred to as *SNP effect*. To adjust for SNP effect, we realigned the SMRT-seq reads from each of the three hLCL lines to their *de novo* genome assembly reference, respectively. Based on the new alignment, we observed the consensus for all four nucleotides (A, T, C and G) across the +/-6,000bp beyond the 5’ UTRs of Human young full length L1s (Supplemental Fig S9b & S10c). DNA modification detection can be affected by heterozygosity in the genome.To exclude this type of bias in the analysis of the hLCL data, we chose a rigorous and conservative design by excluding IPDs on subread positions within (+/-10bp) from those that differ from the aligned genome reference (SNPs, heterozygosity or sequencing errors) in order to minimize these possible biases. In future work, continued method development is necessary to more effectively detect DNA modifications at genomic sites near heterozygous SNPs.

Adjustment for *in silico* control bias: the *in silico* control model learned from bacteria may cause bias when used for Eukaryotic genomes. To examine this potential bias, we used Iso-Seq data where SMRT-seq was applied to cDNA (methylation free) to obtain methylation-free IPD values and compare with IPD values from native DNA samples. The Iso-Seq is originally designed for studying RNA splicing, which is subjected to PCR amplification and expected to have no DNA modifications. Using a recently released Iso-Seq data ([URL](http://www.pacb.com/blog/data-release-alzheimer-brain-isoform-sequencing-iso-seq-dataset/)), we observed the consensus for all four nucleotides across the +/-6,000bp beyond the 5’ UTRs of Human young L1s (Supplemental Fig S9c & S10d).

**Choice of IPD ratio cutoffs** The IPD ratio cutoff (4.5) used in the analysis of green algae data corresponds to an FDR cutoff of 0.05. The IPD ratio cutoff (4) used in the motif analysis of the *Clostridium difficile* data was an illustration to explain the concept of *motif enrichment score*. The IPD ratio cutoff (3) used in the analysis of L1s in hLCL (described in Methods) corresponds to an FDR cutoff of 0.01. Because of the quantitative nature of DNA methylation, researchers have the flexibility to choose different cutoffs depending on the types of analyses. For single nucleotide-level m6dA calling, researchers are recommended to set cutoffs on FDR as it adjusts for multiple hypothesis testing.
